# Supplementary material for: In situ SERS monitoring of photocatalysts by Au-decorated Fe3O4@TiO2 nanocomposites: novel perspectives and insights
Source: Royal Society of Chemistry journal article supplement (doi:10.1039/d1ce01224j), 2021-01-01
Supplement: d1ce01224j1.pdf [file d1ce01224j1.pdf]

***Supplement Information***

**In situ SERS monitoring of photocatalyst by Au-decorated Fe<sub>3</sub>O<sub>4</sub>@TiO<sub>2</sub>  
nanocomposites: novel perspective and insight**

**Sila Jin,<sup>a</sup> Eungyeong Park,<sup>a</sup> Shuang Guo,<sup>a</sup> Yeonju Park,<sup>b</sup> Lei Chen <sup>c\*</sup> and Young Mee Jung <sup>ab\*</sup>**

<sup>a</sup>Department of Chemistry, Institute for Molecular Science and Fusion Technology, Kangwon National University, Chuncheon 24341, Korea

<sup>b</sup>Kangwon Radiation Convergence Research Support Center, Kangwon National University, Chuncheon 24341, Korea.

<sup>c</sup>Key Laboratory of Preparation and Applications of Environmental Friendly Materials (Jilin Normal University), Ministry of Education, Changchun 130103, P.R. China

\*To whom correspondence should be addressed.

E-mail: chenlei@jlnu.edu.cn (L. Chen); ymjung@kangwon.ac.kr (Y.M. Jung)

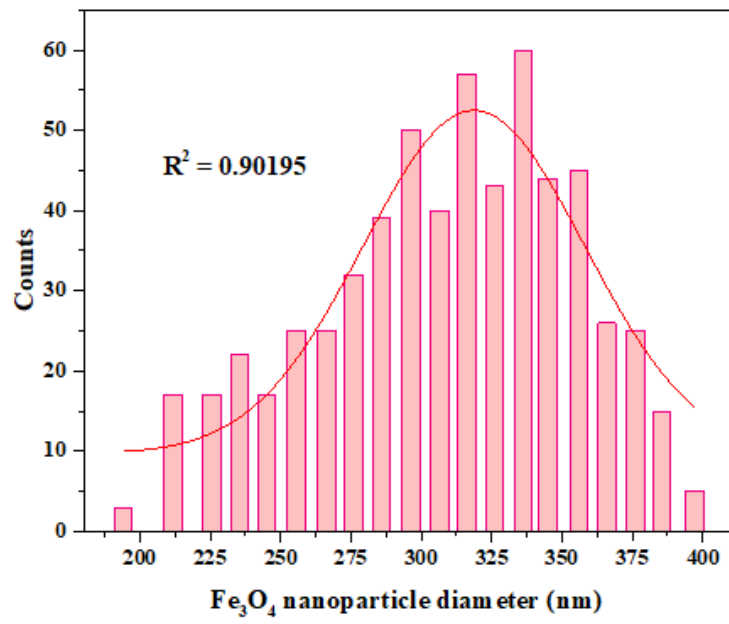

**Fig. S1.** The size distribution of the Fe<sub>3</sub>O<sub>4</sub> NPs.

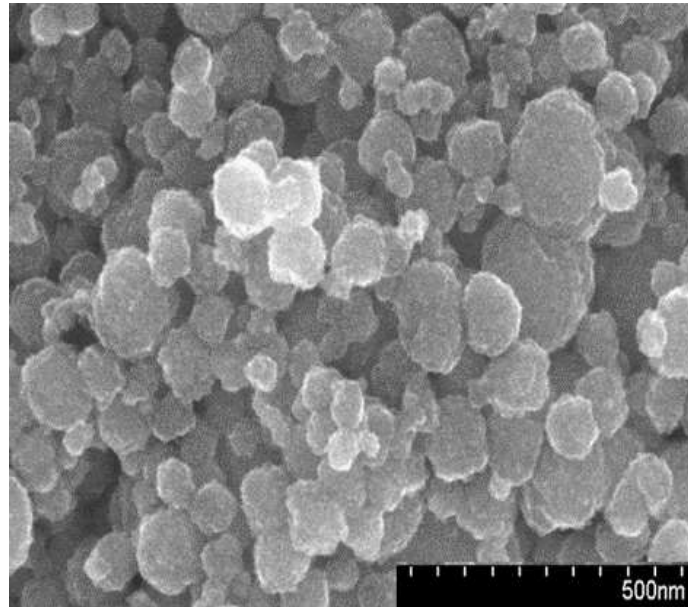

**Fig. S2.** UHR-SEM image of Fe<sub>3</sub>O<sub>4</sub> NPs.

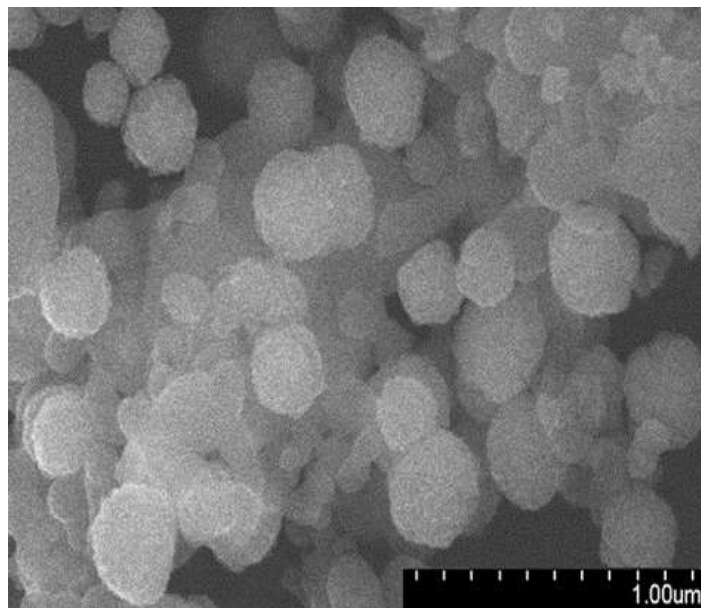

**Fig. S3.** UHR-SEM image of  $\text{Fe}_3\text{O}_4@\text{TiO}_2$  NPs.

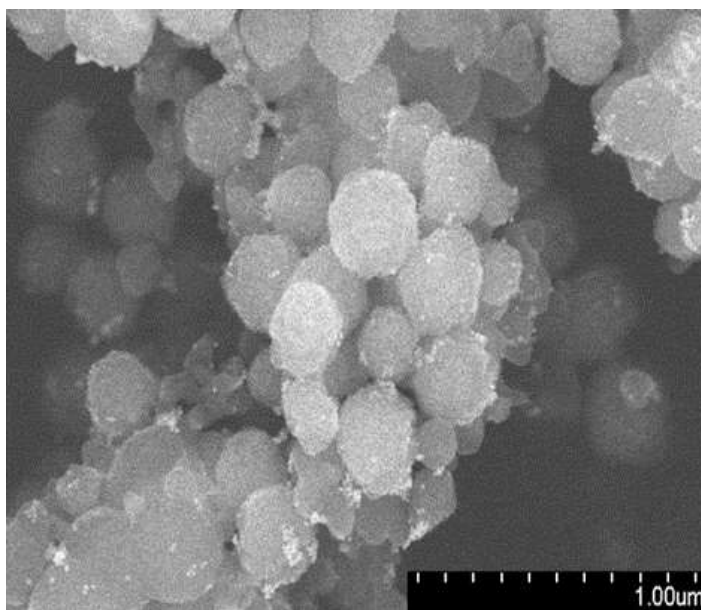

**Fig. S4.** UHR-SEM image of  $\text{Fe}_3\text{O}_4@\text{TiO}_2\text{-Au}$  NPs.

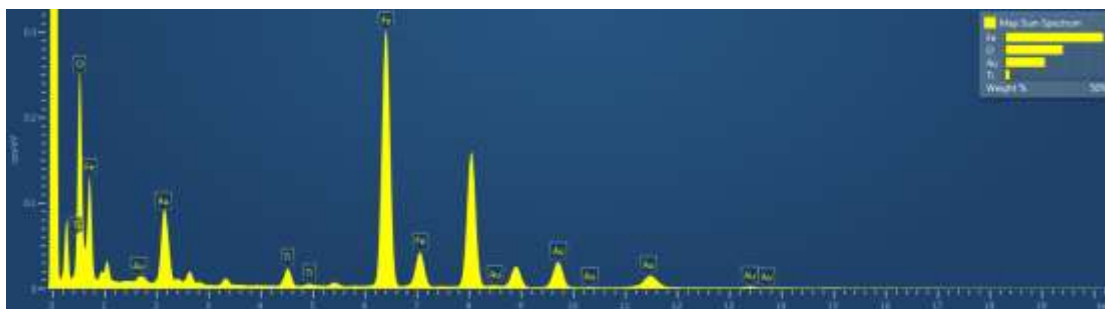

**Fig. S5.** EDS spectrum of  $\text{Fe}_3\text{O}_4@\text{TiO}_2\text{-Au}$  NP from Fig. 1C.

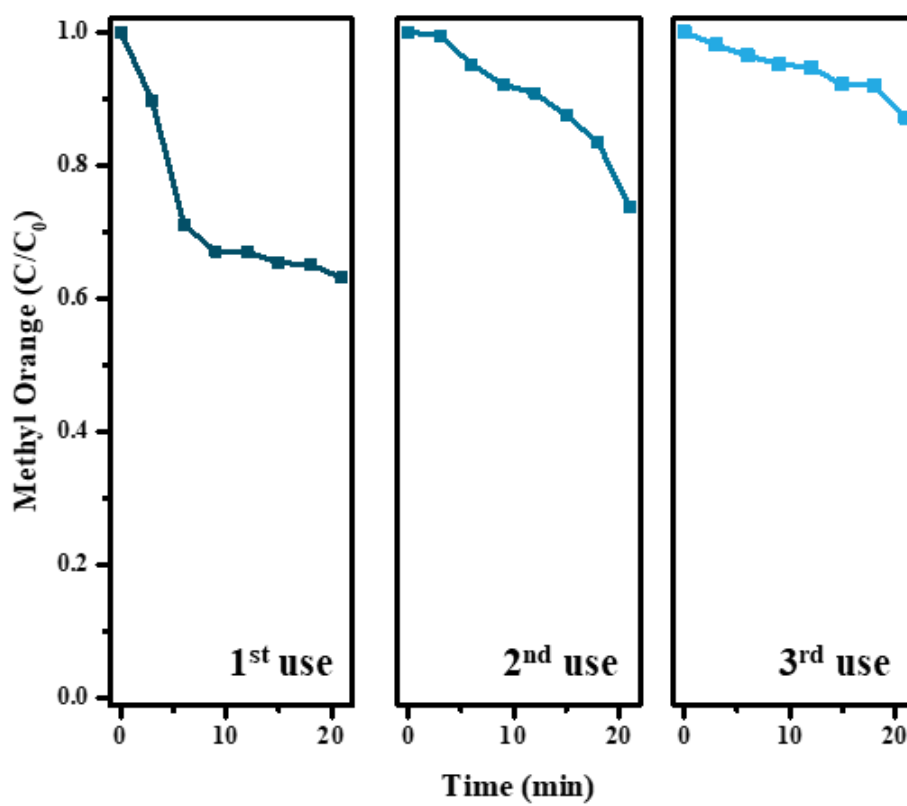

**Fig. S6.** Repeated photocatalytic degradation of MO by  $\text{TiO}_2$  NPs. ( $\text{TiO}_2$  NPs loading: 5.0 g/L; MO concentration:  $5.0 \times 10^{-5}$  M;  $\text{NaBH}_4$  concentration: 0.2 M).

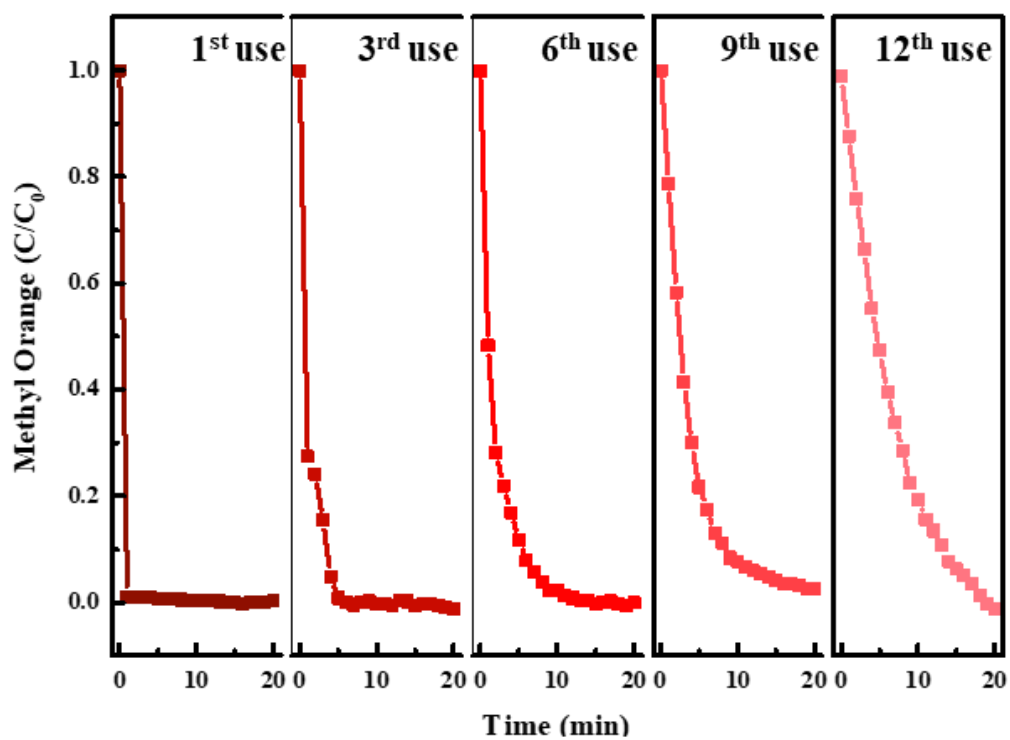

**Fig. S7.** Repeated photocatalytic degradation of MO by Fe<sub>3</sub>O<sub>4</sub>@TiO<sub>2</sub>-Au NPs. (Fe<sub>3</sub>O<sub>4</sub>@TiO<sub>2</sub>-Au NPs loading: 5.0 g/L; MO concentration: 5.0 × 10<sup>-5</sup> M; NaBH<sub>4</sub> concentration: 0.2 M)

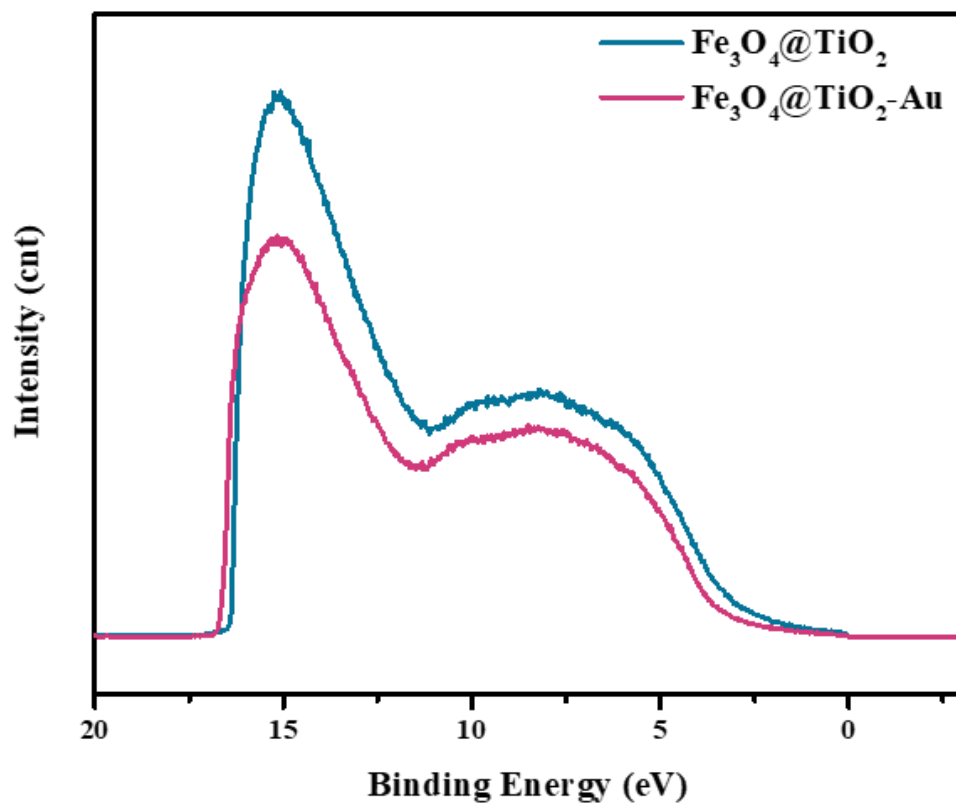

**Fig. S8.** UPS spectra of Fe<sub>3</sub>O<sub>4</sub>@TiO<sub>2</sub> NPs and Fe<sub>3</sub>O<sub>4</sub>@TiO<sub>2</sub>-Au NPs.

**Table S1.** Band assignments of the SERS spectra of 4-MBA

| Raman shift ( $\text{cm}^{-1}$ ) |                                                      |                                                          | Band assignments*                                           |
|----------------------------------|------------------------------------------------------|----------------------------------------------------------|-------------------------------------------------------------|
| Au NPs                           | TiO <sub>2</sub> NPs                                 | Fe <sub>3</sub> O <sub>4</sub> @TiO <sub>2</sub> -Au NPs |                                                             |
|                                  | Fe <sub>3</sub> O <sub>4</sub> @TiO <sub>2</sub> NPs |                                                          |                                                             |
| 1072                             | 1072                                                 | 1072                                                     | In-plane ring breathing, $\nu(\text{C-S})$ , a <sub>1</sub> |
| 1132                             | 1132                                                 | 1132                                                     | $\delta(\text{C-H})$ , b <sub>2</sub>                       |
| 1178                             | 1181                                                 | 1181                                                     | $\delta(\text{C-H})$ , a <sub>1</sub>                       |
|                                  | 1289                                                 | 1289                                                     | $\delta(\text{C-H})$ , $\nu(\text{C-C})$                    |
| 1584                             | 1595                                                 | 1590                                                     | $\nu(\text{C-C})_{\text{Ph}}$                               |

\*  $\nu$ , stretching;  $\delta$ , deformation; Ph, phenyl ring

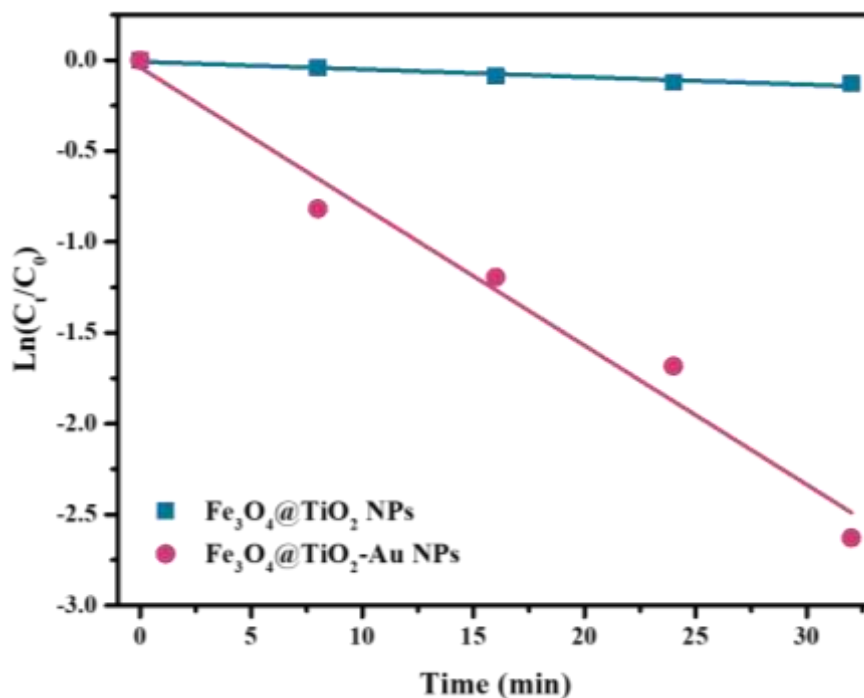**Fig. S9.** Curves of the linear relationship between the concentration of MO and the reaction time according to the intensity changes of a band at  $1392 \text{ cm}^{-1}$ .
